# Supplementary material
Source: publisher site journal article supplement (https://static.cambridge.org/content/id/urn:cambridge.org:id:article:S0016756818000663/resource/name/S0016756818000663supp002.xlsx)
Supplement: Supplementary file 1 [file S0016756818000663supp002.xlsx]

## Sheet: Lapur epsilonHf 
														176Lu/177Hf (CHUR)		0.0336	(Bouvier 2008)			176Lu/177Hf	0.0384	(Griffin et al., 2004)
														176Hf/177Hf (CHUR)		0.282785	(Bouvier 2008)			176Hf/177Hf	0.28325	(Griffin et al., 2004)
Sample ID	176Lu/177Hf	±	176Hf/177Hf	±	Age (Ma)	e^λt - 1	Initial 176/177Hf	εHf (t = now)	εHf (t = age)	± in εHf units	Model Age DM			176Lu λ		1.867e-05	/Ma (Soderlund 2004)			DM Model Ages
Bow20-1	7.71138e-05	1.42433e-06	0.282597	7.57708e-06	603	0.0113216	0.282597	-6.6323	6.79811	0.268123	904.359
Bow20-4	0.000869729	6.80909e-06	0.28244	7.98634e-06	571.3	0.0107233	0.282431	-12.1867	0.22497	0.282762	1143.18
Bow20-5	0.000937529	9.20663e-06	0.282457	7.6508e-06	821.8	0.0154613	0.282442	-11.6132	6.25652	0.270866	1122.52
Bow20-6	0.00072077	2.81992e-06	0.282562	8.56719e-06	775	0.0145744	0.282551	-7.90047	9.06082	0.303197	969.763
Bow20-8	0.000553089	1.085e-05	0.282586	6.2034e-06	802.6	0.0150974	0.282578	-7.03414	10.6281	0.219523	931.442
Bow20-16	0.000916151	1.54026e-05	0.282481	7.90522e-06	801.2	0.0150708	0.282467	-10.7469	6.68369	0.27985	1087.6
Bow20-17	0.00151038	2.28848e-05	0.28256	1.00135e-05	750.8	0.0141161	0.282539	-7.94211	8.09005	0.354384	992.008
Bow20-20	0.00111836	1.04258e-05	0.28257	7.03423e-06	783.5	0.0147355	0.282554	-7.58828	9.35374	0.248937	967.556
Bow20-21	0.00033063	6.16035e-06	0.282495	8.02444e-06	821.2	0.0154499	0.28249	-10.2678	7.92345	0.284056	1052.35
Bow20-26	0.00240291	4.557e-05	0.28252	1.16216e-05	824.3	0.0155087	0.282483	-9.35558	7.76809	0.411355	1074.7
Bow20-28	0.000919474	4.36247e-05	0.282552	9.01065e-06	778.3	0.0146369	0.282539	-8.23158	8.69898	0.318902	987.995
Bow20-30	0.00106921	1.48156e-05	0.282554	6.63323e-06	746.3	0.0140309	0.282539	-8.15289	8.00125	0.234759	988.788
Bow20-32	0.00110957	3.29459e-05	0.282562	9.07023e-06	800.1	0.01505	0.282545	-7.88094	9.42753	0.320999	979.003
Bow20-38	0.000403625	1.4051e-06	0.282468	7.16735e-06	780.3	0.0146748	0.282462	-11.2069	6.03054	0.25374	1091.04
Bow20-51	0.00145603	1.99501e-05	0.282433	8.36125e-06	565.7	0.0106176	0.282417	-12.4548	-0.386352	0.296044	1171.88
Bow20-52	0.00119893	2.8598e-05	0.282586	6.61766e-06	753.8	0.0141729	0.282569	-7.04983	9.20481	0.234182	948.099
Bow20-54	0.00214149	2.9744e-05	0.282563	1.06569e-05	707.8	0.0133023	0.282535	-7.83714	6.97209	0.377149	1004.81
Bow20-58	0.00089985	3.69538e-05	0.282624	1.06065e-05	605.9	0.0113764	0.282614	-5.67906	7.48626	0.375286	886.173				Reference Lines
Bow20-60	0.0006327	6.65259e-06	0.282542	1.22887e-05	567.1	0.010644	0.282536	-8.58038	3.83333	0.434931	994.295				Ma	e0	e10	e20	e-10
Bow20-61	0.000985273	1.9847e-05	0.282598	7.00842e-06	750.4	0.0141086	0.282584	-6.62144	9.66674	0.248	925.689				0	0.282785	0.283068	0.283351	0.282502
Bow20-69	0.00196941	2.65746e-05	0.282557	9.88106e-06	705.9	0.0132664	0.282531	-8.05715	6.79251	0.349701	1009.08				4550	0.279806	0.280089	0.280372	0.279523
Bow20A-1	0.00112473	1.81721e-05	0.282573	8.20539e-06	723.8	0.0136051	0.282557	-7.50795	8.12937	0.290381	964.514
Bow20A-2	0.00168876	1.88076e-05	0.282604	9.6989e-06	714.3	0.0134253	0.282581	-6.40023	8.7637	0.343198	934.304			epsilon Hf DM	0	18
Bow20A-3	0.00103483	1.82288e-05	0.281905	9.30059e-06	883.6	0.0166336	0.281888	-31.1098	-11.9784	0.329919	1893.77				4550	0
Bow20A-6	0.00150227	2.30382e-05	0.282563	9.42403e-06	750.7	0.0141142	0.282542	-7.84019	8.19403	0.333519	987.685
Bow20A-7	0.000692099	1.1695e-05	0.282506	1.97492e-05	868.7	0.0163509	0.282495	-9.86838	9.17707	0.699074	1046.61
Bow20A-9	0.00234777	1.07776e-05	0.282565	1.22039e-05	721.9	0.0135691	0.282533	-7.77956	7.22811	0.431898	1008.13
Bow20A-12	0.000927939	1.57916e-05	0.282531	7.12804e-06	809	0.0152187	0.282517	-8.96564	8.63313	0.252292	1017.34
Bow20A-14	0.000890599	1.08432e-05	0.282625	7.53927e-06	609	0.0114349	0.282615	-5.64205	7.5949	0.266758	884.486
Bow20A-27	0.000443008	1.91826e-05	0.282606	7.3715e-06	631.4	0.011858	0.282601	-6.33617	7.57819	0.26084	901.384
Bow20A-28	0.00109082	1.43424e-05	0.282526	9.60701e-06	720.3	0.0135388	0.282511	-9.15854	6.41613	0.34004	1029.42
Bow20A-29	0.00142978	2.50383e-05	0.282588	7.00608e-06	801	0.0150671	0.282567	-6.95501	10.2039	0.247925	950.15
Bow20A-55	0.00118068	6.14766e-05	0.282612	8.71561e-06	620.2	0.0116464	0.282598	-6.1239	7.23794	0.308395	910.605
Bow20A-66	0.000737193	7.84347e-06	0.282607	7.16305e-06	770.7	0.014493	0.282596	-6.30755	10.5531	0.253464	907.234
Bow20A-69	0.00182293	3.77801e-05	0.28296	1.15175e-05	44	0.000821818	0.282959	6.19883	7.12302	0.407035	422.562
Bow20A-84	0.00109478	2.77669e-05	0.282637	1.19489e-05	637.7	0.011977	0.282624	-5.21639	8.56299	0.422764	872.287
Bow20A-101	0.00136354	1.6835e-05	0.282918	9.05894e-06	56.6	0.00105728	0.282916	4.68634	5.89235	0.320197	478.681
Bow20A-103	0.00130301	1.47517e-05	0.282611	7.96114e-06	603.5	0.0113311	0.282596	-6.16331	6.78708	0.2817	915.164
AD5A-Bow20A-17	0.00137644	0.000108941	0.282569	1.09634e-05	765.3	0.0143907	0.282549	-7.63514	8.7782	0.38799	976.122
AD5A-Bow20A-19	0.000793387	3.95177e-05	0.282586	8.93294e-06	679.3	0.0127633	0.282576	-7.02525	7.7936	0.316114	936.99
AD5A-Bow20A-21	0.00163556	2.35998e-05	0.282963	1.9653e-05	53.4	0.000997475	0.282961	6.28957	7.41794	0.694545	416.708
AD5A-Bow20A-22	6.2052e-05	3.28175e-06	0.28247	8.98215e-06	632	0.0118693	0.282469	-11.1406	2.94047	0.317986	1078.85
AD5A-Bow20A-24	0.00132209	2.60513e-05	0.282563	1.18638e-05	748	0.0140631	0.282544	-7.86	8.20578	0.419865	983.723
AD5A-Bow20A-41	0.00106344	4.79859e-05	0.282584	5.18639e-05	812.9	0.0152926	0.282568	-7.10497	10.5094	1.83534	946.886
AD5A-Bow20A-42	0.000745071	1.08313e-05	0.282551	3.68594e-05	585.6	0.0109931	0.282543	-8.27614	4.50194	1.30452	985.221
AD5A-Bow20A-47	0.00130233	1.89471e-05	0.282549	1.3463e-05	776.9	0.0146104	0.28253	-8.35429	8.34718	0.476485	1003.01
Bow21-1	0.00132694	7.82301e-05	0.282569	1.2942e-05	817.4	0.0153779	0.282549	-7.64046	9.92783	0.458012	975.044
Bow21-4	0.000864991	5.26556e-06	0.282552	9.99922e-06	767.7	0.0144362	0.28254	-8.23411	8.49168	0.353889	986.674
Bow21-5	0.000649477	8.35935e-06	0.282579	7.28849e-06	616.3	0.0115728	0.282572	-7.27159	6.22173	0.257927	943.162
Bow21-8	0.00319348	7.03359e-05	0.282601	1.20017e-05	809.1	0.0152206	0.282552	-6.50645	9.87736	0.424688	978.363
Bow21-11	0.00112699	5.23508e-06	0.28247	1.0492e-05	853.5	0.0160625	0.282452	-11.135	7.32395	0.371436	1109.14
Bow21-12	0.00134043	2.51262e-05	0.282487	1.11099e-05	829.1	0.0155997	0.282466	-10.53	7.27938	0.39329	1091.24
Bow21-13	0.00109577	5.5306e-06	0.282583	8.45329e-06	798.4	0.0150178	0.282566	-7.15755	10.1224	0.299144	949.797
Bow21-14	0.00122249	1.72266e-05	0.282563	9.35021e-06	844.1	0.0158842	0.282544	-7.83491	10.3713	0.330907	980.108
Bow21-15	0.000956736	1.02281e-05	0.282551	8.38678e-06	807.8	0.0151959	0.282537	-8.26147	9.29672	0.296823	990.156
Bow21-19	0.00112987	1.97888e-05	0.282558	8.59811e-06	852.9	0.0160511	0.28254	-8.03489	10.4153	0.304296	985.674
Bow21-28	0.000503591	6.69971e-06	0.282468	9.04305e-06	750.8	0.0141161	0.28246	-11.2244	5.30561	0.320145	1094.58
Bow21-35	0.0013206	2.22373e-05	0.282628	8.7826e-06	681.6	0.0128068	0.282611	-5.55528	9.07725	0.310748	891.172
Bow21-38	0.000778946	2.39902e-05	0.282485	9.84242e-06	770.4	0.0144873	0.282473	-10.6186	6.20658	0.348423	1078.61
Bow21-39	0.000237681	2.0049e-06	0.282629	8.30433e-06	687.4	0.0129165	0.282626	-5.50362	9.74988	0.293824	864.07
AD5A-Bow21-1	0.000946462	2.45741e-05	0.282575	1.02965e-05	791.6	0.0148889	0.282561	-7.41442	9.79534	0.36438	956.249
AD5A-Bow21-2	0.000906262	5.30737e-05	0.282607	3.38448e-05	768.8	0.014457	0.282594	-6.3003	10.4319	1.19759	911.002
AD5A-Bow21-3	0.00080721	1.62079e-05	0.282563	9.05626e-06	797.9	0.0150083	0.282551	-7.85573	9.56551	0.320504	970.202
AD5A-Bow21-4	0.000507791	1.09045e-05	0.282628	7.56109e-06	608.9	0.011433	0.282622	-5.55593	7.83393	0.267528	872.236
AD5A-Bow21-5	0.00108419	4.55769e-05	0.282552	9.29485e-06	782.9	0.0147241	0.282536	-8.25067	8.69492	0.328961	993.077
AD5A-Bow21-6	0.00101112	3.00408e-05	0.28258	8.4824e-06	822	0.0154651	0.282565	-7.23962	10.6023	0.300177	950.931
AD5A-Bow21-7	0.000765462	1.41952e-05	0.28255	6.98615e-06	883	0.0166222	0.282537	-8.31072	11.0113	0.247253	987.116
AD5A-Bow21-8	0.000728702	1.05188e-05	0.282609	7.93012e-06	768.1	0.0144437	0.282599	-6.20763	10.6002	0.280603	903.081
AD5A-Bow21-9	0.000753648	1.18907e-05	0.282574	5.8296e-06	789.5	0.0148491	0.282563	-7.47119	9.79382	0.206304	953.638
AD5A-Bow21-10	0.000942738	1.09498e-05	0.282574	9.2128e-06	826.9	0.015558	0.28256	-7.45366	10.5329	0.326031	957.713
AD5A-Bow21-11	0.00107451	3.27563e-05	0.282562	9.18717e-06	761.3	0.014315	0.282547	-7.86859	8.61091	0.325138	977.6
AD5A-Bow21-12	0.000805593	1.72261e-05	0.282517	9.80327e-06	754.4	0.0141843	0.282506	-9.46611	6.99513	0.346997	1033.84
AD5A-Bow21-15	0.000482376	1.71262e-05	0.282612	7.55731e-06	581.4	0.0109139	0.282607	-6.1242	6.66593	0.26741	893.985
AD5A-Bow21-16	0.000735996	1.55797e-05	0.282527	9.51029e-06	778.1	0.0146332	0.282516	-9.11404	7.9057	0.336615	1018.06
AD5A-Bow21-18	0.000545989	4.22696e-06	0.282549	7.62746e-06	602	0.0113027	0.282543	-8.3434	4.87463	0.269952	982.729
AD5A-Bow21-19	0.00065687	1.27674e-05	0.282446	8.71411e-06	818.6	0.0154006	0.282436	-11.9934	5.95849	0.308523	1129.2
AD5A-Bow21-20	0.000666913	1.93126e-05	0.28251	8.30775e-06	805.6	0.0151542	0.2825	-9.71449	7.94841	0.294069	1039.86
AD5A-Bow21-21	0.000418173	1.02775e-05	0.282636	7.98917e-06	725.7	0.013641	0.28263	-5.26624	10.7575	0.282666	858.828
AD5A-Bow21-24	0.00112096	2.52717e-05	0.282519	1.08483e-05	820.9	0.0154443	0.282501	-9.41581	8.33786	0.383986	1040.5
AD5A-Bow21-28	0.000841378	4.72098e-06	0.282578	8.82162e-06	776.1	0.0145953	0.282566	-7.31434	9.6099	0.312183	949.632
AD5A-Bow21-29	0.000990492	2.80366e-05	0.282578	8.40479e-06	763.5	0.0143566	0.282564	-7.32722	9.24397	0.297433	953.896
Bow22-1	0.00141144	3.96384e-05	0.282594	1.32053e-05	801.2	0.0150708	0.282572	-6.76407	10.4093	0.467289	942.001
Bow22-4	0.00114116	1.10231e-05	0.282588	7.97244e-06	729.1	0.0137054	0.282572	-6.96282	8.78288	0.282122	943.166
Bow22-5	0.000773611	3.24945e-05	0.282567	1.03004e-05	864.6	0.0162731	0.282554	-7.71862	11.1932	0.36453	963.923
Bow22-7	0.000895363	3.40923e-05	0.282569	8.44282e-06	761.5	0.0143188	0.282556	-7.64919	8.92591	0.298788	964.27
Bow22-11	0.00058886	1.21785e-05	0.282475	8.18617e-06	848.5	0.0159676	0.282466	-10.9474	7.70714	0.289801	1086.15
Bow22-12	0.000753676	1.15288e-05	0.282575	9.15821e-06	741.8	0.0139458	0.282565	-7.42191	8.79107	0.324098	951.691
Bow22-48*	0.0015335	9.00658e-06	0.282843	1.02269e-05	57.7	0.00107784	0.282841	2.05227	3.27491	0.361576	588.024
Bow22-70	0.00115138	8.6071e-06	0.282549	8.61356e-06	743.9	0.0139855	0.282533	-8.3312	7.72954	0.304852	998.066
Bow22-71	0.00100701	1.57089e-05	0.282478	7.41751e-06	788.7	0.014834	0.282463	-10.8654	6.24277	0.262587	1094.92
Bow22-72	0.00154618	3.13831e-05	0.282574	9.00206e-06	761.6	0.0143206	0.282552	-7.46481	8.78265	0.318574	973.703
Bow22-73	0.00145474	1.96393e-05	0.282583	9.60519e-06	742.3	0.0139552	0.282562	-7.1577	8.72019	0.339907	958.949
Bow22-88	0.000861705	2.03433e-05	0.282535	9.69123e-06	763.1	0.0143491	0.282523	-8.82941	7.79591	0.343009	1010.17
Bow22-97*	0.00181772	1.42075e-05	0.282853	1.50041e-05	56.7	0.00105915	0.282851	2.40413	3.59497	0.530457	578.157
AD5A-Bow22-1	0.000882816	1.59337e-05	0.282563	1.03665e-05	802.6	0.0150974	0.28255	-7.85412	9.63026	0.366874	972.076
AD5A-Bow22-2	0.000610528	8.71354e-06	0.282604	9.65463e-06	770.1	0.0144816	0.282596	-6.38686	10.5254	0.341631	907.344
AD5A-Bow22-3	0.00105271	7.76898e-06	0.282469	9.75665e-06	823.7	0.0154973	0.282452	-11.1886	6.66042	0.345407	1109.08
AD5A-Bow22-5	0.000884058	1.07461e-05	0.282563	1.11751e-05	765.4	0.0143926	0.28255	-7.85055	8.81561	0.39549	971.966
AD5A-Bow22-6	0.000879957	1.64377e-05	0.282476	9.12105e-06	811.7	0.0152698	0.282463	-10.9151	6.76533	0.322896	1093.21
AD5A-Bow22-7	0.00110744	2.92554e-05	0.282508	8.50791e-06	765.5	0.0143945	0.282492	-9.81125	6.73985	0.301157	1055.87
AD5A-Bow22-8	0.000770855	1.10915e-05	0.282467	8.64388e-06	821.9	0.0154632	0.282455	-11.2393	6.7246	0.306013	1102.86
AD5A-Bow22-9	0.00111982	2.02521e-05	0.282589	8.2458e-06	745.5	0.0140158	0.282573	-6.94347	9.1701	0.291795	941.858
AD5A-Bow22-10	0.000635487	1.06507e-05	0.282464	9.33646e-06	820.2	0.015431	0.282454	-11.3415	6.65878	0.330536	1102.96
AD5A-Bow22-26	0.000278251	1.03436e-06	0.282527	9.89384e-06	591.1	0.011097	0.282524	-9.10804	3.97321	0.350191	1005.71
AD5A-Bow22-27	0.00128419	7.36385e-06	0.282559	7.80889e-06	708.2	0.0133099	0.282542	-7.98271	7.23888	0.276363	987.644
AD5A-Bow22-46	0.000921886	8.23417e-06	0.282554	7.67444e-06	741.1	0.0139325	0.282541	-8.16024	7.95306	0.271609	985.228
AD5A-Bow22-47	2.88689e-05	6.28166e-07	0.282586	6.73084e-06	608.1	0.0114179	0.282585	-7.05012	6.51363	0.238188	919.446
AD5A-Bow22-48	0.00119738	6.68752e-06	0.282575	7.92072e-06	798.6	0.0150216	0.282557	-7.42612	9.80369	0.280305	963.108
AD5A-Bow22-49	0.00140174	1.6895e-05	0.282503	1.15734e-05	817.9	0.0153874	0.282481	-9.98522	7.54884	0.409674	1071.17
AD6-Bow24-3	0.00110993	1.42181e-05	0.282522	8.93625e-06	859.5	0.0161763	0.282504	-9.3102	9.29314	0.316303	1035.98
AD6-Bow24-4	0.00087262	1.40659e-05	0.282396	9.00269e-06	1041.2	0.0196294	0.282379	-13.7687	8.96977	0.318797	1205.73
AD6-Bow24-5	0.000658189	2.57189e-06	0.281034	9.74109e-06	2741	0.0525065	0.280999	-61.9271	-0.76669	0.346616	3056.28
AD6-Bow24-7	0.00035067	1.31298e-06	0.281551	7.19783e-06	879.2	0.0165501	0.281546	-43.6261	-24.2144	0.255649	2339.38
AD6-Bow24-8	0.000565443	8.31147e-06	0.281453	9.69796e-06	942.6	0.0177541	0.281443	-47.1152	-26.4309	0.344568	2485.89
AD6-Bow24-9	0.00111149	5.78616e-06	0.282395	1.16106e-05	890.1	0.016757	0.282376	-13.8034	5.45925	0.411149	1214.74
AD6-Bow24-12	0.00086674	6.14056e-06	0.282369	7.52067e-06	805	0.0151429	0.282356	-14.7144	2.81899	0.266342	1242.85
AD6-Bow24-14	0.00056783	3.52798e-07	0.282497	1.09846e-05	742.9	0.0139666	0.282489	-10.1868	6.13776	0.388841	1055.7
AD6-Bow24-17	0.00144589	1.78306e-05	0.282532	1.34345e-05	743.6	0.0139798	0.282512	-8.94838	6.95896	0.475502	1030.77
AD6-Bow24-18	0.000950906	3.50607e-05	0.282487	1.1328e-05	746.6	0.0140366	0.282473	-10.5495	5.666	0.40101	1080.77
AD6-Bow24-21	0.000957551	5.15209e-05	0.28189	8.63412e-06	692.1	0.0130054	0.281878	-31.6347	-16.6481	0.306294	1910.42
AD6-Bow24-25	0.00168679	1.023e-05	0.282397	9.70543e-06	856.7	0.0161232	0.28237	-13.7141	4.49008	0.34368	1229.96
* Note that Bow-22-48 and Bow-22-97 is the same grain analysed twice

## Sheet: Muruanachok epsilonHf 
														176Lu/177Hf (CHUR)		0.0336	(Bouvier 2008)			176Lu/177Hf	0.0384	(Griffin et al., 2004)
														176Hf/177Hf (CHUR)		0.282785	(Bouvier 2008)			176Hf/177Hf	0.28325	(Griffin et al., 2004)
Sample ID	176Lu/177Hf	±	176Hf/177Hf	±	Age (Ma)	e^λt - 1	Initial 176/177Hf	εHf (t = now)	εHf (t = age)	± in εHf units	Model Age DM			176Lu λ		1.867e-05	/Ma (Soderlund 2004)			DM Model Ages
Bow1-2	0.000719422	1.38747e-05	0.282591	8.76243e-06	635	0.011926	0.282582	-6.86769	7.0091	0.310075	928.943
Bow1-3	0.000633728	3.93921e-06	0.2819	9.77973e-06	886	0.0166792	0.28189	-31.2811	-11.8605	0.346921	1880.64
Bow1-5	0.00206542	5.37452e-05	0.282236	8.0567e-06	559.3	0.0104968	0.282215	-19.4024	-7.70658	0.285459	1473.82
Bow1-6	0.000812004	1.09793e-05	0.282524	8.34185e-06	818.6	0.0154006	0.282511	-9.24137	8.63097	0.295262	1025.13
Bow1-7	0.000591648	6.37768e-06	0.282557	7.75509e-06	768.4	0.0144494	0.282548	-8.06218	8.81919	0.274461	972.843
Bow1-10	0.000907602	1.23869e-05	0.282499	9.07352e-06	813.1	0.0152964	0.282485	-10.1271	7.57058	0.321188	1062.81
Bow1-11	0.000633346	6.34787e-06	0.282563	8.0936e-06	751.2	0.0141237	0.282555	-7.83294	8.64679	0.286435	964.878
Bow1-12	0.00131793	7.43879e-06	0.282573	8.94336e-06	752	0.0141389	0.282555	-7.48203	8.67313	0.316497	968.454
Bow1-19	0.000648384	1.38926e-06	0.282567	8.3629e-06	763.9	0.0143642	0.282558	-7.7058	9.04757	0.295962	960.249
Bow1-26	0.000276626	6.32492e-06	0.282592	6.93934e-06	604.1	0.0113424	0.282589	-6.83773	6.53694	0.245561	917.075
Bow1-27	0.000701836	2.48064e-06	0.28112	9.91555e-06	2632.1	0.0503688	0.281084	-58.895	-0.299639	0.352716	2944.54
Bow1-28	0.000568231	4.26678e-06	0.281898	7.9691e-06	923	0.0173817	0.281888	-31.3723	-11.0918	0.282694	1880.96
Bow1-34	0.000587575	2.20475e-05	0.281104	8.56253e-06	2655.4	0.0508258	0.281074	-59.4558	-0.122302	0.304604	2957.14
Bow1-40	0.00161705	2.55424e-05	0.281155	9.20151e-06	2690.6	0.0515166	0.281071	-57.6582	0.610749	0.327276	2967.61
Bow1-46	0.000555078	7.49426e-06	0.282548	9.31053e-06	765.1	0.0143869	0.28254	-8.37534	8.45099	0.32952	984.218
Bow1-51	0.000962793	1.11912e-05	0.28177	7.06987e-06	563.4	0.0105742	0.28176	-35.9023	-23.7281	0.250909	2077.03
Bow1-58	0.00071415	4.11574e-06	0.281833	8.57303e-06	769.9	0.0144778	0.281823	-33.6691	-16.8615	0.304188	1977.16
Bow1-60	0.000497078	5.84683e-07	0.281064	8.5189e-06	2650.3	0.0507257	0.281039	-60.8593	-1.48855	0.303095	3003.33				Reference Lines
Bow1-70	0.000976853	3.77746e-05	0.282524	8.69467e-06	753.6	0.0141692	0.28251	-9.24404	7.11401	0.30775	1029.71				Ma	e0	e10	e20	e-10
Bow1-72	0.00254724	3.88195e-05	0.282628	1.15738e-05	754.6	0.0141881	0.282592	-5.5433	10.0537	0.409507	920.904				0	0.282785	0.283068	0.283351	0.282502
Bow1-75A	0.000788424	1.17608e-05	0.282058	1.09677e-05	923.7	0.017395	0.282045	-25.6923	-5.52018	0.388844	1670.52				4550	0.279806	0.280089	0.280372	0.279523
Bow1-78	0.000840801	3.83281e-06	0.282552	8.46125e-06	818.5	0.0153988	0.282539	-8.23894	9.61732	0.299458	986.236
Bow2-13	0.000410992	5.34765e-06	0.282211	7.70254e-06	564.8	0.0106006	0.282207	-20.2893	-7.85782	0.272935	1444.9			epsilon Hf DM	0	18
Bow2-14	0.000346691	1.55189e-06	0.282567	6.7681e-06	734.1	0.0138	0.282562	-7.71465	8.52706	0.239522	953.049				4550	0
Bow2-21	0.000667508	6.07095e-06	0.281116	9.95733e-06	2718	0.0520546	0.281081	-59.0243	1.60732	0.354207	2946.84
Bow2-32	0.000799245	1.33146e-05	0.281046	7.86371e-06	2740.9	0.0525045	0.281004	-61.4857	-0.58837	0.279801	3050.63
Bow2-41	0.000645042	1.8722e-05	0.282587	8.03753e-06	624.6	0.0117295	0.28258	-6.98514	6.69346	0.284426	931.759
Bow2-44	0.00107158	4.36174e-06	0.282505	9.93919e-06	759.6	0.0142828	0.28249	-9.89864	6.54176	0.351823	1058.34
Bow2-45	0.00228899	1.95737e-05	0.281522	9.80752e-06	977.9	0.0184251	0.28148	-44.6494	-24.3016	0.348374	2503.09
Bow2-46	0.0013056	1.2993e-05	0.282402	8.74191e-06	977	0.018408	0.282378	-13.5549	7.48365	0.309556	1211.11
Bow2-51	0.00176715	1.45621e-05	0.282567	8.63955e-06	801.4	0.0150746	0.282541	-7.70339	9.28261	0.305752	989.208
Bow2-56	0.000578755	6.74483e-06	0.281952	6.89013e-06	618.1	0.0116068	0.281945	-29.4658	-15.9344	0.244372	1807.71
Bow2-57	0.00044418	1.49516e-06	0.282342	7.85409e-06	618.8	0.01162	0.282337	-15.6571	-2.03574	0.278176	1265.92
Bow2-60	0.0011538	8.71054e-06	0.282603	8.18255e-06	801.2	0.0150708	0.282585	-6.44448	10.867	0.289542	922.769
Bow2-65	0.000861763	7.59588e-06	0.281118	7.43905e-06	2705.7	0.0518131	0.281074	-58.9424	1.0485	0.264624	2958.55
Bow2-92	0.000637155	4.41257e-06	0.28252	9.63083e-06	842.8	0.0158595	0.28251	-9.37095	9.13292	0.34089	1025.53
Bow2-95	0.00105715	2.87655e-05	0.28109	8.23663e-06	2799.5	0.0536567	0.281033	-59.9336	1.82607	0.293024	3011.63
Bow26-2	0.00151643	7.821e-05	0.282641	8.69314e-06	731.3	0.013747	0.28262	-5.10208	10.5118	0.307568	877.559
Bow26-4	0.000932155	3.00226e-05	0.282459	8.56638e-06	614.9	0.0115463	0.282448	-11.5278	1.81321	0.303279	1118.98
Bow26-6	0.000667765	4.22404e-06	0.281101	9.3724e-06	2645.6	0.0506335	0.281068	-59.5355	-0.572799	0.333417	2966.28
Bow26-13	0.00112415	2.26873e-05	0.282625	1.0614e-05	618.5	0.0116143	0.282612	-5.6642	7.68463	0.375551	890.868
Bow26-16	0.00133404	1.5293e-05	0.282589	8.60954e-06	796.8	0.0149875	0.282569	-6.92867	10.1903	0.304666	946.66
Bow26-19	0.00173084	3.69223e-05	0.281155	1.04583e-05	2647.8	0.0506767	0.281067	-57.6543	-0.546264	0.371978	2976.42
Bow26-20	0.00102113	1.14943e-05	0.282626	9.89888e-06	611.2	0.0114765	0.282614	-5.62435	7.60774	0.350247	886.844
Bow26-30	0.00174809	1.39798e-05	0.282463	9.93831e-06	805	0.0151429	0.282436	-11.4035	5.66307	0.351845	1138.6
Bow26-34	0.00196608	7.70687e-05	0.282245	8.7507e-06	619.3	0.0116294	0.282223	-19.0788	-6.07781	0.310039	1456.76
Bow26-35	0.00226656	0.000113915	0.28252	9.90882e-06	805	0.0151429	0.282486	-9.3731	7.419	0.35073	1071.4
Bow26-37	0.000893659	2.46151e-06	0.282441	7.95274e-06	777.9	0.0146294	0.282428	-12.1639	4.76437	0.281572	1143
Bow26-38	0.00114422	4.19311e-05	0.282529	8.77345e-06	736.4	0.0138435	0.282513	-9.05855	6.84119	0.310533	1026.89
Bow26-43	0.00108709	4.5826e-05	0.282213	9.52772e-06	586	0.0110007	0.282201	-20.2358	-7.59782	0.337608	1468.61
Bow26-44	0.000755883	1.15285e-05	0.281161	7.55879e-06	2650.8	0.0507355	0.281122	-57.4449	1.49096	0.268842	2893.4
Bow26-51	0.00164631	3.49081e-05	0.282617	1.51434e-05	614.5	0.0115388	0.282598	-5.94172	7.10643	0.535827	914.662
Bow26-53	0.00154279	5.25517e-05	0.282535	8.55394e-06	810	0.0152376	0.282511	-8.85142	8.43761	0.302757	1029.54
Bow26-67	0.000668234	2.29142e-06	0.282626	8.23032e-06	582.2	0.010929	0.282619	-5.61894	7.11764	0.291209	878.404
Bow26-71	0.000656918	1.4364e-05	0.282541	8.58834e-06	736.1	0.0138379	0.282532	-8.62876	7.50401	0.303968	996.832
Bow26-73	0.000735856	2.77256e-05	0.28262	9.14069e-06	615.7	0.0115614	0.282611	-5.84311	7.60359	0.323427	888.835
Bow26-80	0.00198149	1.50303e-05	0.282547	9.00232e-06	764.8	0.0143812	0.282519	-8.40231	7.69067	0.318613	1023.5

## Sheet: Normalization Factor estimate
Analysis	176Hf/177Hf	176Hf/177Hf Normalised	Err 1σ	175Lu/177Hf	Err 1σ	176Lu/177Hf			MTZ average
MTZ-01	0.282482		6.55212e-06	0.000396738	1.44183e-06	1.0533e-05			0.282493			0.026549
MTZ-02	0.282495		5.41993e-06	0.000327027	1.21725e-06	8.68223e-06
MTZ-03	0.282497		5.77787e-06	0.000349623	1.49174e-06	9.28215e-06			MTZ solution
MTZ-04	0.282494		6.95151e-06	0.00030469	1.50714e-06	8.08922e-06			0.282507
MTZ-05	0.282492		6.32844e-06	0.000351167	1.493e-06	9.32315e-06
MTZ-06	0.28249		6.14338e-06	0.000392188	1.92522e-06	1.04122e-05			Normalization				FC1 average measured	FC1 average normalized
MTZ-07	0.28251		6.04457e-06	0.00052912	1.84877e-06	1.40476e-05			1.00005				0.282163	0.282178
MTZ-08	0.282487		5.71609e-06	0.00020984	1.6317e-06	5.57104e-06
MTZ-09	0.282487		6.19406e-06	0.000418656	1.72301e-06	1.11149e-05							FC1 solution (Woodhead and Hergt, 2005)	FC1 solution (Fisher et al, 2014)
MTZ-10	0.28249		5.77452e-06	0.000321085	1.48392e-06	8.5245e-06							0.282184	0.282183
MTZ-11	0.282483		6.3707e-06	0.00036487	1.77408e-06	9.68693e-06
MTZ-12	0.282502		6.54513e-06	0.000485596	1.23169e-06	1.28921e-05
MTZ-13	0.282503		7.71349e-06	0.000466399	1.51454e-06	1.23824e-05
MTZ-14	0.2825		5.18921e-06	0.00048645	2.42654e-06	1.29148e-05
MTZ-15	0.282482		0.000409	0.000625461	0.000322944	1.66054e-05
MTZ-16	0.282493		6.32807e-06	0.000554512	3.25582e-06	1.47217e-05
MTZ-17	0.282486		5.95013e-06	0.000483307	1.37571e-06	1.28313e-05
MTZ-18	0.282499		5.52323e-06	0.000384013	1.37199e-06	1.01952e-05					Err 1σ
FC1-01	0.282159	0.282174	9.69241e-06	0.0531345	0.000143056	0.00141067			1.00005		3.79799e-06
FC1-02	0.282162	0.282177	8.02518e-06	0.0522589	0.00017624	0.00138742			1.00005		4.67899e-06
FC1-03	0.282168	0.282182	9.14712e-06	0.0519941	0.000176021	0.00138039			1.00005		4.67319e-06
FC1-04	0.282172	0.282186	8.03138e-06	0.0543925	0.000190881	0.00144407			1.00005		5.06771e-06
FC1-05	0.28216	0.282174	9.83333e-06	0.0552292	0.000335175	0.00146628			1.00005		8.89857e-06
FC1-06	0.282174	0.282188	9.58497e-06	0.0583217	0.000650219	0.00154838			1.00005		1.72627e-05
FC1-07	0.282182	0.282197	6.89935e-06	0.0559283	0.000402849	0.00148484			1.00005		1.06952e-05
FC1-08	0.282172	0.282186	8.4607e-06	0.064312	0.00031697	0.00170742			1.00005		8.41522e-06
FC1-09	0.282144	0.282158	7.89463e-06	0.0431952	1.03013e-05	0.00114679			1.00005		2.7349e-07
FC1-10	0.28217	0.282184	9.22347e-06	0.0602733	0.000337896	0.0016002			1.00005		8.9708e-06
FC1-11	0.282163	0.282177	9.33855e-06	0.0574856	0.00109402	0.00152618			1.00005		2.90452e-05
FC1-12	0.282147	0.282161	9.785e-06	0.0403064	0.000122501	0.00107009			1.00005		3.25229e-06
FC1-13	0.282151	0.282165	8.30659e-06	0.0292006	0.000143733	0.000775246			1.00005		3.81597e-06
Bow1-2	0.282577	0.282591	8.76243e-06	0.0270979	0.000522609	0.000719422			1.00005		1.38747e-05
Bow1-3	0.281886	0.2819	9.77973e-06	0.0238701	0.000148375	0.000633728			1.00005		3.93921e-06
Bow1-5	0.282222	0.282236	8.0567e-06	0.0777965	0.00202438	0.00206542			1.00005		5.37452e-05
Bow1-6	0.28251	0.282524	8.34185e-06	0.0305851	0.00041355	0.000812004			1.00005		1.09793e-05
Bow1-7	0.282543	0.282557	7.75509e-06	0.0222851	0.000240223	0.000591648			1.00005		6.37768e-06
Bow1-10	0.282484	0.282499	9.07352e-06	0.0341859	0.000466567	0.000907602			1.00005		1.23869e-05
Bow1-11	0.282549	0.282563	8.0936e-06	0.0238557	0.0002391	0.000633346			1.00005		6.34787e-06
Bow1-12	0.282559	0.282573	8.94336e-06	0.0496416	0.000280191	0.00131793			1.00005		7.43879e-06
Bow1-19	0.282553	0.282567	8.3629e-06	0.0244222	5.23281e-05	0.000648384			1.00005		1.38926e-06
Bow1-26	0.282578	0.282592	6.93934e-06	0.0104194	0.000238236	0.000276626			1.00005		6.32492e-06
Bow1-27	0.281105	0.28112	9.91555e-06	0.0264355	9.34363e-05	0.000701836			1.00005		2.48064e-06
Bow1-28	0.281884	0.281898	7.9691e-06	0.0214031	0.000160713	0.000568231			1.00005		4.26678e-06
Bow1-34	0.28109	0.281104	8.56253e-06	0.0221317	0.000830444	0.000587575			1.00005		2.20475e-05
Bow1-40	0.28114	0.281155	9.20151e-06	0.0609083	0.000962084	0.00161705			1.00005		2.55424e-05
Bow1-46	0.282534	0.282548	9.31053e-06	0.0209077	0.00028228	0.000555078			1.00005		7.49426e-06
Bow1-51	0.281756	0.28177	7.06987e-06	0.0362647	0.000421529	0.000962793			1.00005		1.11912e-05
Bow1-58	0.281819	0.281833	8.57303e-06	0.0268993	0.000155024	0.00071415			1.00005		4.11574e-06
Bow1-60	0.28105	0.281064	8.5189e-06	0.018723	2.20228e-05	0.000497078			1.00005		5.84683e-07
Bow1-70	0.282509	0.282524	8.69467e-06	0.0367943	0.00142283	0.000976853			1.00005		3.77746e-05
Bow1-72	0.282614	0.282628	1.15738e-05	0.0959447	0.00146218	0.00254724			1.00005		3.88195e-05
Bow1-75A	0.282044	0.282058	1.09677e-05	0.0296969	0.000442986	0.000788424			1.00005		1.17608e-05
Bow1-78	0.282538	0.282552	8.46125e-06	0.0316698	0.000144367	0.000840801			1.00005		3.83281e-06
Bow2-13	0.282197	0.282211	7.70254e-06	0.0154805	0.000201426	0.000410992			1.00005		5.34765e-06
Bow2-14	0.282553	0.282567	6.7681e-06	0.0130586	5.84539e-05	0.000346691			1.00005		1.55189e-06
Bow2-21	0.281102	0.281116	9.95733e-06	0.0251425	0.00022867	0.000667508			1.00005		6.07095e-06
Bow2-32	0.281032	0.281046	7.86371e-06	0.0301045	0.000501509	0.000799245			1.00005		1.33146e-05
Bow2-41	0.282573	0.282587	8.03753e-06	0.0242963	0.000705185	0.000645042			1.00005		1.8722e-05
Bow2-44	0.282491	0.282505	9.93919e-06	0.0403624	0.00016429	0.00107158			1.00005		4.36174e-06
Bow2-45	0.281508	0.281522	9.80752e-06	0.0862174	0.000737266	0.00228899			1.00005		1.95737e-05
Bow2-46	0.282388	0.282402	8.74191e-06	0.0491769	0.000489396	0.0013056			1.00005		1.2993e-05
Bow2-51	0.282553	0.282567	8.63955e-06	0.0665619	0.000548498	0.00176715			1.00005		1.45621e-05
Bow2-56	0.281938	0.281952	6.89013e-06	0.0217995	0.000254052	0.000578755			1.00005		6.74483e-06
Bow2-57	0.282328	0.282342	7.85409e-06	0.0167306	5.63172e-05	0.00044418			1.00005		1.49516e-06
Bow2-60	0.282589	0.282603	8.18255e-06	0.0434591	0.000328093	0.0011538			1.00005		8.71054e-06
Bow2-65	0.281104	0.281118	7.43905e-06	0.0324594	0.000286108	0.000861763			1.00005		7.59588e-06
Bow2-92	0.282506	0.28252	9.63083e-06	0.0239992	0.000166205	0.000637155			1.00005		4.41257e-06
Bow2-95	0.281076	0.28109	8.23663e-06	0.0398187	0.00108349	0.00105715			1.00005		2.87655e-05
Bow6-2	0.282838	0.282852	9.89001e-06	0.0528216	0.000348931	0.00140236			1.00005		9.26377e-06
Bow6-3	0.282823	0.282837	1.28494e-05	0.0456247	0.000186904	0.00121129			1.00005		4.96213e-06
Bow6-4	0.282822	0.282836	1.01414e-05	0.0386679	0.000367312	0.00102659			1.00005		9.75177e-06
Bow6-5	0.282825	0.282839	8.80802e-06	0.0506288	0.000779132	0.00134414			1.00005		2.06852e-05
Bow6-6	0.282833	0.282848	8.7512e-06	0.0439234	0.000844224	0.00116612			1.00005		2.24133e-05
Bow6-7	0.282835	0.282849	7.97896e-06	0.0357717	0.000512839	0.000949703			1.00005		1.36154e-05
Bow6-10	0.282532	0.282546	7.20917e-06	0.0424242	0.000344692	0.00112632			1.00005		9.15122e-06
Bow6-12	0.281447	0.281461	9.55068e-06	0.0584018	0.00151412	0.00155051			1.00005		4.01984e-05
Bow6-15	0.28172	0.281734	1.16496e-05	0.0417048	0.000871956	0.00110722			1.00005		2.31496e-05
Bow6-17	0.281408	0.281422	6.8714e-06	0.0428348	0.000624701	0.00113722			1.00005		1.65852e-05
Bow7A-1	0.282898	0.282912	1.41273e-05	0.0700802	0.000399588	0.00186056			1.00005		1.06087e-05
Bow7A-2	0.282895	0.28291	1.44372e-05	0.0694451	0.000147659	0.0018437			1.00005		3.92019e-06
Bow7A-3	0.281575	0.281589	1.00368e-05	0.0158242	0.000145176	0.000420117			1.00005		3.85427e-06
Bow7A-4	0.282917	0.282931	1.29074e-05	0.0904444	0.0013354	0.00240121			1.00005		3.54537e-05
Bow7A-6	0.282916	0.282931	1.54206e-05	0.13225	0.00122139	0.0035111			1.00005		3.24266e-05
Bow7A-7	0.281567	0.281581	9.45639e-06	0.0279554	6.23616e-05	0.000742188			1.00005		1.65564e-06
Bow7A-8	0.281416	0.28143	7.73362e-06	0.0241636	0.000371868	0.00064152			1.00005		9.87273e-06
Bow7A-12	0.281448	0.281462	9.89914e-06	0.0643187	0.000804563	0.0017076			1.00005		2.13603e-05
Bow7A-13	0.282887	0.282901	1.30923e-05	0.0872566	0.000692151	0.00231657			1.00005		1.83759e-05
Bow7A-16	0.282894	0.282908	1.19795e-05	0.105053	0.000759245	0.00278904			1.00005		2.01572e-05
Bow7A-22	0.281439	0.281453	9.7862e-06	0.0451491	0.000548429	0.00119866			1.00005		1.45602e-05
Bow9-4	0.28136	0.281374	7.20286e-06	0.0293664	0.000864331	0.000779648			1.00005		2.29471e-05
Bow9-6	0.281154	0.281168	9.79796e-06	0.0361504	0.00104675	0.000959758			1.00005		2.77901e-05
Bow9-7	0.282503	0.282517	7.15114e-06	0.0234319	0.0011825	0.000622095			1.00005		3.13942e-05
Bow9-8	0.282584	0.282598	6.73021e-06	0.0185679	0.000427184	0.000492959			1.00005		1.13413e-05
Bow9-9	0.282584	0.282598	9.03386e-06	0.0223509	0.000435765	0.000593394			1.00005		1.15691e-05
Bow9-10	0.282808	0.282822	8.31575e-06	0.0321396	0.000224992	0.000853275			1.00005		5.97331e-06
Bow9-12	0.281342	0.281356	6.02431e-06	0.00824511	0.000434368	0.000218899			1.00005		1.1532e-05
Bow9-13	0.282493	0.282507	8.71345e-06	0.0366779	0.00057024	0.000973763			1.00005		1.51393e-05
Bow9-15	0.282466	0.28248	9.56975e-06	0.0445308	0.000795916	0.00118225			1.00005		2.11308e-05
Bow9-16	0.281341	0.281355	7.65302e-06	0.0225463	0.000554782	0.000598581			1.00005		1.47289e-05
Bow9-17	0.282433	0.282447	8.77973e-06	0.0881843	0.000981287	0.00234121			1.00005		2.60522e-05
Bow9-18	0.282548	0.282562	1.05152e-05	0.0583282	0.000673916	0.00154856			1.00005		1.78918e-05
Bow9-19	0.282775	0.282789	9.02762e-06	0.0611175	0.000927624	0.00162261			1.00005		2.46275e-05
Bow9-21	0.282541	0.282555	9.75312e-06	0.07656	0.00166279	0.00203259			1.00005		4.41453e-05
Bow9-23	0.282507	0.282521	7.80808e-06	0.0326747	0.000190912	0.000867481			1.00005		5.06851e-06
Bow9-24	0.281115	0.281129	7.9827e-06	0.0326356	8.85227e-05	0.000866442			1.00005		2.35019e-06
Bow9-25	0.281416	0.28143	8.59952e-06	0.0295622	0.000801031	0.000784847			1.00005		2.12666e-05
Bow9-26	0.282445	0.28246	9.1461e-06	0.0197104	0.000200376	0.000523292			1.00005		5.31979e-06
Bow9-27	0.282557	0.282571	8.62516e-06	0.0644704	0.000375461	0.00171162			1.00005		9.96812e-06
Bow9-28	0.281094	0.281108	7.81982e-06	0.031709	0.000434289	0.000841841			1.00005		1.15299e-05
Bow9-29	0.281018	0.281032	7.30594e-06	0.0175183	3.48039e-05	0.000465092			1.00005		9.24009e-07
Bow9-30	0.281132	0.281146	1.14327e-05	0.0421201	0.00050196	0.00111825			1.00005		1.33265e-05
Bow20-1	0.282583	0.282597	7.57708e-06	0.00290458	5.36491e-05	7.71138e-05			1.00005		1.42433e-06
Bow20-4	0.282426	0.28244	7.98634e-06	0.0327594	0.000256473	0.000869729			1.00005		6.80909e-06
Bow20-5	0.282442	0.282457	7.6508e-06	0.0353132	0.000346779	0.000937529			1.00005		9.20663e-06
Bow20-6	0.282547	0.282562	8.56719e-06	0.0271487	0.000106216	0.00072077			1.00005		2.81992e-06
Bow20-8	0.282572	0.282586	6.2034e-06	0.0208328	0.00040868	0.000553089			1.00005		1.085e-05
Bow20-16	0.282467	0.282481	7.90522e-06	0.0345079	0.000580156	0.000916151			1.00005		1.54026e-05
Bow20-17	0.282546	0.28256	1.00135e-05	0.0568901	0.000861983	0.00151038			1.00005		2.28848e-05
Bow20-20	0.282556	0.28257	7.03423e-06	0.0421245	0.000392701	0.00111836			1.00005		1.04258e-05
Bow20-21	0.282481	0.282495	8.02444e-06	0.0124536	0.000232037	0.00033063			1.00005		6.16035e-06
Bow20-26	0.282506	0.28252	1.16216e-05	0.0905084	0.00171645	0.00240291			1.00005		4.557e-05
Bow20-28	0.282538	0.282552	9.01065e-06	0.0346331	0.00164318	0.000919474			1.00005		4.36247e-05
Bow20-30	0.28254	0.282554	6.63323e-06	0.0402731	0.000558049	0.00106921			1.00005		1.48156e-05
Bow20-32	0.282548	0.282562	9.07023e-06	0.0417932	0.00124095	0.00110957			1.00005		3.29459e-05
Bow20-38	0.282454	0.282468	7.16735e-06	0.015203	5.29246e-05	0.000403625			1.00005		1.4051e-06
Bow20-51	0.282419	0.282433	8.36125e-06	0.0548429	0.000751445	0.00145603			1.00005		1.99501e-05
Bow20-52	0.282572	0.282586	6.61766e-06	0.0451592	0.00107718	0.00119893			1.00005		2.8598e-05
Bow20-54	0.282549	0.282563	1.06569e-05	0.0806618	0.00112034	0.00214149			1.00005		2.9744e-05
Bow20-58	0.28261	0.282624	1.06065e-05	0.0338939	0.00139191	0.00089985			1.00005		3.69538e-05
Bow20-60	0.282528	0.282542	1.22887e-05	0.0238314	0.000250578	0.0006327			1.00005		6.65259e-06
Bow20-61	0.282584	0.282598	7.00842e-06	0.0371115	0.000747561	0.000985273			1.00005		1.9847e-05
Bow20-69	0.282543	0.282557	9.88106e-06	0.0741802	0.00100096	0.00196941			1.00005		2.65746e-05
Bow20A-1	0.282559	0.282573	8.20539e-06	0.0423645	0.000684473	0.00112473			1.00005		1.81721e-05
Bow20A-2	0.28259	0.282604	9.6989e-06	0.0636091	0.000708411	0.00168876			1.00005		1.88076e-05
Bow20A-3	0.281891	0.281905	9.30059e-06	0.0389782	0.00068661	0.00103483			1.00005		1.82288e-05
Bow20A-6	0.282549	0.282563	9.42403e-06	0.056585	0.000867762	0.00150227			1.00005		2.30382e-05
Bow20A-7	0.282492	0.282506	1.97492e-05	0.0260688	0.000440506	0.000692099			1.00005		1.1695e-05
Bow20A-9	0.282551	0.282565	1.22039e-05	0.0884315	0.000405953	0.00234777			1.00005		1.07776e-05
Bow20A-12	0.282517	0.282531	7.12804e-06	0.0349519	0.000594809	0.000927939			1.00005		1.57916e-05
Bow20A-14	0.282611	0.282625	7.53927e-06	0.0335455	0.000408423	0.000890599			1.00005		1.08432e-05
Bow20A-25	0.278368	0.278382	0.00426503	0.0906791	0.00328329	0.00240744			1.00005		8.71682e-05
Bow20A-27	0.282592	0.282606	7.3715e-06	0.0166864	0.000722535	0.000443008			1.00005		1.91826e-05
Bow20A-28	0.282512	0.282526	9.60701e-06	0.0410869	0.000540224	0.00109082			1.00005		1.43424e-05
Bow20A-29	0.282574	0.282588	7.00608e-06	0.0538543	0.000943099	0.00142978			1.00005		2.50383e-05
Bow20A-55	0.282598	0.282612	8.71561e-06	0.0444716	0.00231559	0.00118068			1.00005		6.14766e-05
Bow20A-66	0.282592	0.282607	7.16305e-06	0.0277673	0.000295434	0.000737193			1.00005		7.84347e-06
Bow20A-69	0.282946	0.28296	1.15175e-05	0.0686628	0.00142303	0.00182293			1.00005		3.77801e-05
Bow20A-84	0.282623	0.282637	1.19489e-05	0.0412361	0.00104587	0.00109478			1.00005		2.77669e-05
Bow20A-101	0.282903	0.282918	9.05894e-06	0.0513595	0.000634109	0.00136354			1.00005		1.6835e-05
Bow20A-103	0.282597	0.282611	7.96114e-06	0.0490793	0.00055564	0.00130301			1.00005		1.47517e-05
AD5A-Bow20A-17	0.282555	0.282569	1.09634e-05	0.0518453	0.0041034	0.00137644			1.00005		0.000108941
AD5A-Bow20A-19	0.282572	0.282586	8.93294e-06	0.0298839	0.00148848	0.000793387			1.00005		3.95177e-05
AD5A-Bow20A-21	0.282949	0.282963	1.9653e-05	0.0616055	0.000888916	0.00163556			1.00005		2.35998e-05
AD5A-Bow20A-22	0.282456	0.28247	8.98215e-06	0.00233726	0.000123611	6.2052e-05			1.00005		3.28175e-06
AD5A-Bow20A-24	0.282549	0.282563	1.18638e-05	0.0497982	0.000981253	0.00132209			1.00005		2.60513e-05
AD5A-Bow20A-41	0.28257	0.282584	5.18639e-05	0.0400556	0.00180744	0.00106344			1.00005		4.79859e-05
AD5A-Bow20A-42	0.282537	0.282551	3.68594e-05	0.028064	0.000407973	0.000745071			1.00005		1.08313e-05
AD5A-Bow20A-47	0.282535	0.282549	1.3463e-05	0.049054	0.000713665	0.00130233			1.00005		1.89471e-05
Bow21-1	0.282555	0.282569	1.2942e-05	0.0499808	0.00294663	0.00132694			1.00005		7.82301e-05
Bow21-4	0.282538	0.282552	9.99922e-06	0.0325809	0.000198334	0.000864991			1.00005		5.26556e-06
Bow21-5	0.282565	0.282579	7.28849e-06	0.0244633	0.000314865	0.000649477			1.00005		8.35935e-06
Bow21-8	0.282587	0.282601	1.20017e-05	0.120286	0.00264929	0.00319348			1.00005		7.03359e-05
Bow21-11	0.282456	0.28247	1.0492e-05	0.0424495	0.000197186	0.00112699			1.00005		5.23508e-06
Bow21-12	0.282473	0.282487	1.11099e-05	0.0504888	0.000946407	0.00134043			1.00005		2.51262e-05
Bow21-13	0.282568	0.282583	8.45329e-06	0.0412733	0.000208317	0.00109577			1.00005		5.5306e-06
Bow21-14	0.282549	0.282563	9.35021e-06	0.0460464	0.000648862	0.00122249			1.00005		1.72266e-05
Bow21-15	0.282537	0.282551	8.38678e-06	0.0360366	0.000385253	0.000956736			1.00005		1.02281e-05
Bow21-19	0.282544	0.282558	8.59811e-06	0.0425579	0.000745369	0.00112987			1.00005		1.97888e-05
Bow21-28	0.282453	0.282468	9.04305e-06	0.0189684	0.000252353	0.000503591			1.00005		6.69971e-06
Bow21-35	0.282614	0.282628	8.7826e-06	0.0497419	0.000837593	0.0013206			1.00005		2.22373e-05
Bow21-38	0.282471	0.282485	9.84242e-06	0.0293399	0.000903618	0.000778946			1.00005		2.39902e-05
Bow21-39	0.282615	0.282629	8.30433e-06	0.00895255	7.55171e-05	0.000237681			1.00005		2.0049e-06
AD5A-Bow21-1	0.282561	0.282575	1.02965e-05	0.0356496	0.000925614	0.000946462			1.00005		2.45741e-05
AD5A-Bow21-2	0.282593	0.282607	3.38448e-05	0.0341354	0.00199909	0.000906262			1.00005		5.30737e-05
AD5A-Bow21-3	0.282549	0.282563	9.05626e-06	0.0304045	0.000610492	0.00080721			1.00005		1.62079e-05
AD5A-Bow21-4	0.282614	0.282628	7.56109e-06	0.0191266	0.000410732	0.000507791			1.00005		1.09045e-05
AD5A-Bow21-5	0.282538	0.282552	9.29485e-06	0.0408372	0.00171671	0.00108419			1.00005		4.55769e-05
AD5A-Bow21-6	0.282566	0.28258	8.4824e-06	0.038085	0.00113152	0.00101112			1.00005		3.00408e-05
AD5A-Bow21-7	0.282536	0.28255	6.98615e-06	0.028832	0.000534678	0.000765462			1.00005		1.41952e-05
AD5A-Bow21-8	0.282595	0.282609	7.93012e-06	0.0274474	0.000396204	0.000728702			1.00005		1.05188e-05
AD5A-Bow21-9	0.28256	0.282574	5.8296e-06	0.028387	0.000447879	0.000753648			1.00005		1.18907e-05
AD5A-Bow21-10	0.28256	0.282574	9.2128e-06	0.0355093	0.000412437	0.000942738			1.00005		1.09498e-05
AD5A-Bow21-11	0.282548	0.282562	9.18717e-06	0.0404728	0.00123381	0.00107451			1.00005		3.27563e-05
AD5A-Bow21-12	0.282503	0.282517	9.80327e-06	0.0303436	0.000648843	0.000805593			1.00005		1.72261e-05
AD5A-Bow21-15	0.282598	0.282612	7.55731e-06	0.0181693	0.000645081	0.000482376			1.00005		1.71262e-05
AD5A-Bow21-16	0.282513	0.282527	9.51029e-06	0.0277222	0.000586827	0.000735996			1.00005		1.55797e-05
AD5A-Bow21-18	0.282535	0.282549	7.62746e-06	0.0205653	0.000159214	0.000545989			1.00005		4.22696e-06
AD5A-Bow21-19	0.282432	0.282446	8.71411e-06	0.0247418	0.000480901	0.00065687			1.00005		1.27674e-05
AD5A-Bow21-20	0.282496	0.28251	8.30775e-06	0.0251201	0.000727432	0.000666913			1.00005		1.93126e-05
AD5A-Bow21-21	0.282622	0.282636	7.98917e-06	0.015751	0.000387113	0.000418173			1.00005		1.02775e-05
AD5A-Bow21-24	0.282505	0.282519	1.08483e-05	0.0422222	0.000951889	0.00112096			1.00005		2.52717e-05
AD5A-Bow21-28	0.282564	0.282578	8.82162e-06	0.0316915	0.000177821	0.000841378			1.00005		4.72098e-06
AD5A-Bow21-29	0.282564	0.282578	8.40479e-06	0.0373081	0.00105603	0.000990492			1.00005		2.80366e-05
Bow22-1	0.28258	0.282594	1.32053e-05	0.0531635	0.00149303	0.00141144			1.00005		3.96384e-05
Bow22-4	0.282574	0.282588	7.97244e-06	0.0429833	0.000415199	0.00114116			1.00005		1.10231e-05
Bow22-5	0.282553	0.282567	1.03004e-05	0.029139	0.00122394	0.000773611			1.00005		3.24945e-05
Bow22-7	0.282555	0.282569	8.44282e-06	0.0337249	0.00128413	0.000895363			1.00005		3.40923e-05
Bow22-11	0.282461	0.282475	8.18617e-06	0.0221801	0.000458717	0.00058886			1.00005		1.21785e-05
Bow22-12	0.282561	0.282575	9.15821e-06	0.0283881	0.000434248	0.000753676			1.00005		1.15288e-05
Bow22-48	0.282829	0.282843	1.02269e-05	0.0577611	0.000339244	0.0015335			1.00005		9.00658e-06
Bow22-70	0.282535	0.282549	8.61356e-06	0.0433681	0.000324197	0.00115138			1.00005		8.6071e-06
Bow22-71	0.282464	0.282478	7.41751e-06	0.0379302	0.000591695	0.00100701			1.00005		1.57089e-05
Bow22-72	0.28256	0.282574	9.00206e-06	0.0582389	0.00118208	0.00154618			1.00005		3.13831e-05
Bow22-73	0.282568	0.282583	9.60519e-06	0.0547946	0.000739739	0.00145474			1.00005		1.96393e-05
Bow22-88	0.282521	0.282535	9.69123e-06	0.0324571	0.000766255	0.000861705			1.00005		2.03433e-05
Bow22-97	0.282839	0.282853	1.50041e-05	0.0684668	0.000535141	0.00181772			1.00005		1.42075e-05
AD5A-Bow22-1	0.282549	0.282563	1.03665e-05	0.0332523	0.000600162	0.000882816			1.00005		1.59337e-05
AD5A-Bow22-2	0.28259	0.282604	9.65463e-06	0.0229963	0.000328206	0.000610528			1.00005		8.71354e-06
AD5A-Bow22-3	0.282454	0.282469	9.75665e-06	0.0396518	0.000292628	0.00105271			1.00005		7.76898e-06
AD5A-Bow22-4	0.281222	0.281236	0.0015513	0.02683	0.000333288	0.00071231			1.00005		8.84845e-06
AD5A-Bow22-5	0.282549	0.282563	1.11751e-05	0.0332991	0.000404764	0.000884058			1.00005		1.07461e-05
AD5A-Bow22-6	0.282462	0.282476	9.12105e-06	0.0331447	0.000619145	0.000879957			1.00005		1.64377e-05
AD5A-Bow22-7	0.282493	0.282508	8.50791e-06	0.041713	0.00110194	0.00110744			1.00005		2.92554e-05
AD5A-Bow22-8	0.282453	0.282467	8.64388e-06	0.0290352	0.000417775	0.000770855			1.00005		1.10915e-05
AD5A-Bow22-9	0.282575	0.282589	8.2458e-06	0.0421794	0.000762818	0.00111982			1.00005		2.02521e-05
AD5A-Bow22-10	0.28245	0.282464	9.33646e-06	0.0239364	0.00040117	0.000635487			1.00005		1.06507e-05
AD5A-Bow22-26	0.282513	0.282527	9.89384e-06	0.0104806	3.89603e-05	0.000278251			1.00005		1.03436e-06
AD5A-Bow22-27	0.282545	0.282559	7.80889e-06	0.0483705	0.000277368	0.00128419			1.00005		7.36385e-06
AD5A-Bow22-43	0.27451	0.274524	0.00828814	0.0512011	0.00212685	0.00135934			1.00005		5.64656e-05
AD5A-Bow22-46	0.28254	0.282554	7.67444e-06	0.0347239	0.00031015	0.000921886			1.00005		8.23417e-06
AD5A-Bow22-47	0.282571	0.282586	6.73084e-06	0.00108738	2.36606e-05	2.88689e-05			1.00005		6.28166e-07
AD5A-Bow22-48	0.282561	0.282575	7.92072e-06	0.0451007	0.000251893	0.00119738			1.00005		6.68752e-06
AD5A-Bow22-49	0.282489	0.282503	1.15734e-05	0.0527983	0.000636371	0.00140174			1.00005		1.6895e-05
AD6-Bow24-3	0.282508	0.282522	8.93625e-06	0.0418068	0.000535541	0.00110993			1.00005		1.42181e-05
AD6-Bow24-4	0.282382	0.282396	9.00269e-06	0.0328683	0.00052981	0.00087262			1.00005		1.40659e-05
AD6-Bow24-5	0.28102	0.281034	9.74109e-06	0.0247915	9.68733e-05	0.000658189			1.00005		2.57189e-06
AD6-Bow24-7	0.281537	0.281551	7.19783e-06	0.0132084	4.94551e-05	0.00035067			1.00005		1.31298e-06
AD6-Bow24-8	0.281439	0.281453	9.69796e-06	0.0212981	0.000313062	0.000565443			1.00005		8.31147e-06
AD6-Bow24-9	0.282381	0.282395	1.16106e-05	0.0418654	0.000217943	0.00111149			1.00005		5.78616e-06
AD6-Bow24-10	0.282374	0.282388	8.705e-06	0.0334899	0.000449675	0.000889122			1.00005		1.19384e-05
AD6-Bow24-11	0.282489	0.282503	7.51408e-06	0.0244051	0.000253637	0.00064793			1.00005		6.7338e-06
AD6-Bow24-12	0.282355	0.282369	7.52067e-06	0.0326468	0.000231292	0.00086674			1.00005		6.14056e-06
AD6-Bow24-13	0.282496	0.28251	8.88649e-06	0.0339748	0.000720637	0.000901998			1.00005		1.91322e-05
AD6-Bow24-14	0.282483	0.282497	1.09846e-05	0.021388	1.32886e-05	0.00056783			1.00005		3.52798e-07
AD6-Bow24-17	0.282518	0.282532	1.34345e-05	0.0544612	0.000671613	0.00144589			1.00005		1.78306e-05
AD6-Bow24-18	0.282473	0.282487	1.1328e-05	0.035817	0.00132061	0.000950906			1.00005		3.50607e-05
AD6-Bow24-20	0.282453	0.282467	2.5336e-05	0.0963843	0.00730969	0.00255891			1.00005		0.000194065
AD6-Bow24-21	0.281876	0.28189	8.63412e-06	0.0360673	0.0019406	0.000957551			1.00005		5.15209e-05
AD6-Bow24-25	0.282383	0.282397	9.70543e-06	0.063535	0.000385327	0.00168679			1.00005		1.023e-05
AD6-Bow24-26	0.280885	0.280899	7.91899e-06	0.0171772	0.000671739	0.000456036			1.00005		1.7834e-05
AD6-Bow24-27	0.282364	0.282378	9.21741e-06	0.0344407	0.000778698	0.000914367			1.00005		2.06737e-05
Bow26-2	0.282627	0.282641	8.69314e-06	0.0571181	0.00294587	0.00151643			1.00005		7.821e-05
Bow26-4	0.282445	0.282459	8.56638e-06	0.0351107	0.00113084	0.000932155			1.00005		3.00226e-05
Bow26-6	0.281087	0.281101	9.3724e-06	0.0251522	0.000159104	0.000667765			1.00005		4.22404e-06
Bow26-13	0.282611	0.282625	1.0614e-05	0.0423425	0.000854546	0.00112415			1.00005		2.26873e-05
Bow26-16	0.282575	0.282589	8.60954e-06	0.0502482	0.00057603	0.00133404			1.00005		1.5293e-05
Bow26-19	0.281141	0.281155	1.04583e-05	0.0651942	0.00139072	0.00173084			1.00005		3.69223e-05
Bow26-20	0.282612	0.282626	9.89888e-06	0.038462	0.000432947	0.00102113			1.00005		1.14943e-05
Bow26-25	0.281151	0.281165	2.50226e-05	0.0417862	0.00113889	0.00110938			1.00005		3.02365e-05
Bow26-30	0.282448	0.282463	9.93831e-06	0.0658441	0.000526566	0.00174809			1.00005		1.39798e-05
Bow26-34	0.282231	0.282245	8.7507e-06	0.0740548	0.00290289	0.00196608			1.00005		7.70687e-05
Bow26-35	0.282506	0.28252	9.90882e-06	0.0853728	0.00429074	0.00226656			1.00005		0.000113915
Bow26-37	0.282427	0.282441	7.95274e-06	0.0336607	9.27156e-05	0.000893659			1.00005		2.46151e-06
Bow26-38	0.282515	0.282529	8.77345e-06	0.0430986	0.00157938	0.00114422			1.00005		4.19311e-05
Bow26-43	0.282199	0.282213	9.52772e-06	0.0409466	0.00172609	0.00108709			1.00005		4.5826e-05
Bow26-44	0.281146	0.281161	7.55879e-06	0.0284713	0.000434233	0.000755883			1.00005		1.15285e-05
Bow26-51	0.282603	0.282617	1.51434e-05	0.0620101	0.00131485	0.00164631			1.00005		3.49081e-05
Bow26-53	0.282521	0.282535	8.55394e-06	0.058111	0.00197942	0.00154279			1.00005		5.25517e-05
Bow26-67	0.282612	0.282626	8.23032e-06	0.0251699	8.6309e-05	0.000668234			1.00005		2.29142e-06
Bow26-71	0.282527	0.282541	8.58834e-06	0.0247436	0.000541036	0.000656918			1.00005		1.4364e-05
Bow26-73	0.282606	0.28262	9.14069e-06	0.0277169	0.00104432	0.000735856			1.00005		2.77256e-05
Bow26-76	0.281347	0.281361	9.56262e-06	0.00267394	0.000127182	7.09904e-05			1.00005		3.37654e-06
Bow26-80	0.282533	0.282547	9.00232e-06	0.0746351	0.000566135	0.00198149			1.00005		1.50303e-05

## Sheet: Mass Spectrometer cup config
		Cup	L4	L3	L2	L1	C	H1	H2	H3
		Isotope	171Yb	173Yb	175Lu	176Hf	177Hf	178Hf	179Hf	180Hf
		Mass spectrometer cup configuration
